# Supplementary material for: Temporal Effects on Radiation Responses in Nonhuman Primates: Identification of Biofluid Small Molecule Signatures by Gas Chromatography–Mass Spectrometry Metabolomics
Source: MDPI journal article supplement (doi:10.3390/metabo9050098), 2019-05-15
Supplement: s1 [file s1]

**Table S1**

Normalized abundance of compounds detected by GC-TOF-MS global profiling of NHP biofluids after 4 Gy  $\gamma$  radiation exposure.

|       | <b>Metabolite name</b>     | <b>Pre</b>      | <b>1 d</b>      | <b>3 d</b>      | <b>5 d</b>      | <b>7 d</b>      | <b>15 d</b>     | <b>21 d</b>     | <b>28 d</b>     | <b>60 d</b>     |
|-------|----------------------------|-----------------|-----------------|-----------------|-----------------|-----------------|-----------------|-----------------|-----------------|-----------------|
| Urine | Allantoic acid             | 0.14 $\pm$ 0.05 | 0.10 $\pm$ 0.04 | 0.12 $\pm$ 0.07 | 0.02 $\pm$ 0.01 | 0.00 $\pm$ 0.00 | 0.01 $\pm$ 0.01 | 0.02 $\pm$ 0.02 | 0.00 $\pm$ 0.00 | 0.02 $\pm$ 0.02 |
|       | 5-Hydroxyindoleacetic acid | 0.01 $\pm$ 0.00 | 0.02 $\pm$ 0.01 | 0.01 $\pm$ 0.00 | 0.00 $\pm$ 0.00 | 0.00 $\pm$ 0.00 | 0.02 $\pm$ 0.01 | 0.02 $\pm$ 0.01 | 0.00 $\pm$ 0.00 | 0.04 $\pm$ 0.01 |
| Serum | Oleic acid                 | 0.23 $\pm$ 0.09 | 0.00 $\pm$ 0.00 | 0.59 $\pm$ 0.19 | 1.25 $\pm$ 0.25 | 1.06 $\pm$ 0.33 | 0.81 $\pm$ 0.13 | 0.92 $\pm$ 0.13 | 0.69 $\pm$ 0.11 | 0.69 $\pm$ 0.03 |
|       | Inosine                    | 1.31 $\pm$ 0.32 | 0.96 $\pm$ 0.22 | 1.40 $\pm$ 0.46 | 0.96 $\pm$ 0.41 | 0.42 $\pm$ 0.22 | 0.00 $\pm$ 0.00 | 0.00 $\pm$ 0.00 | 0.36 $\pm$ 0.18 | 0.00 $\pm$ 0.00 |
|       | Leucine                    | 2.20 $\pm$ 0.20 | 2.70 $\pm$ 0.46 | 4.97 $\pm$ 0.51 | 3.57 $\pm$ 0.44 | 3.43 $\pm$ 0.63 | 2.73 $\pm$ 0.36 | 3.86 $\pm$ 0.61 | 2.32 $\pm$ 0.40 | 3.09 $\pm$ 0.64 |
|       | Isoleucine                 | 1.33 $\pm$ 0.09 | 1.68 $\pm$ 0.20 | 2.51 $\pm$ 0.17 | 1.78 $\pm$ 0.16 | 1.80 $\pm$ 0.24 | 1.57 $\pm$ 0.15 | 1.85 $\pm$ 0.27 | 1.44 $\pm$ 0.21 | 1.67 $\pm$ 0.32 |
|       | Valine                     | 0.23 $\pm$ 0.09 | 0.00 $\pm$ 0.00 | 0.59 $\pm$ 0.19 | 1.25 $\pm$ 0.25 | 1.06 $\pm$ 0.33 | 0.81 $\pm$ 0.13 | 0.92 $\pm$ 0.13 | 0.69 $\pm$ 0.11 | 0.69 $\pm$ 0.03 |
|       | Serine                     | 4.57 $\pm$ 0.41 | 4.69 $\pm$ 0.43 | 6.92 $\pm$ 0.53 | 5.32 $\pm$ 0.44 | 5.57 $\pm$ 0.55 | 4.71 $\pm$ 0.49 | 5.81 $\pm$ 0.46 | 4.20 $\pm$ 0.36 | 4.71 $\pm$ 0.73 |
|       | Threonine                  | 4.92 $\pm$ 0.48 | 6.98 $\pm$ 0.67 | 7.58 $\pm$ 0.40 | 5.23 $\pm$ 0.54 | 5.71 $\pm$ 0.83 | 4.36 $\pm$ 0.35 | 4.90 $\pm$ 0.57 | 4.03 $\pm$ 0.41 | 5.66 $\pm$ 1.02 |
|       | Phenylalanine              | 2.45 $\pm$ 0.17 | 3.10 $\pm$ 0.27 | 3.38 $\pm$ 0.33 | 2.60 $\pm$ 0.24 | 2.83 $\pm$ 0.23 | 2.72 $\pm$ 0.17 | 3.26 $\pm$ 0.36 | 1.99 $\pm$ 0.18 | 2.51 $\pm$ 0.19 |

(Mean  $\pm$  SEM)

**Table S2**

Comparisons of log fold changes (logFC) of urinary TCA cycle intermediates at 7 d after a 4 Gy  $\gamma$  radiation exposure in a previous NHP cohort [25,26] and the current cohort.

| <b>Biofluid</b> | <b>Metabolite</b>         | <b>logFC Control vs. 7 d<br/>Previous Cohort</b> | <b>logFC Control vs. 7 d<br/>Current Cohort</b> |
|-----------------|---------------------------|--------------------------------------------------|-------------------------------------------------|
| Urine           | Citric acid               | -0.35                                            | -0.27                                           |
|                 | Isocitric acid            | -0.26                                            | -0.20                                           |
|                 | <i>cis</i> -Aconitic acid | -0.18                                            | -0.08                                           |
|                 | Malic acid                | -0.11                                            | -0.26                                           |
|                 | Succinic acid             | -0.13                                            | -0.21                                           |
|                 | Fumaric acid              | 0.05                                             | -0.11                                           |

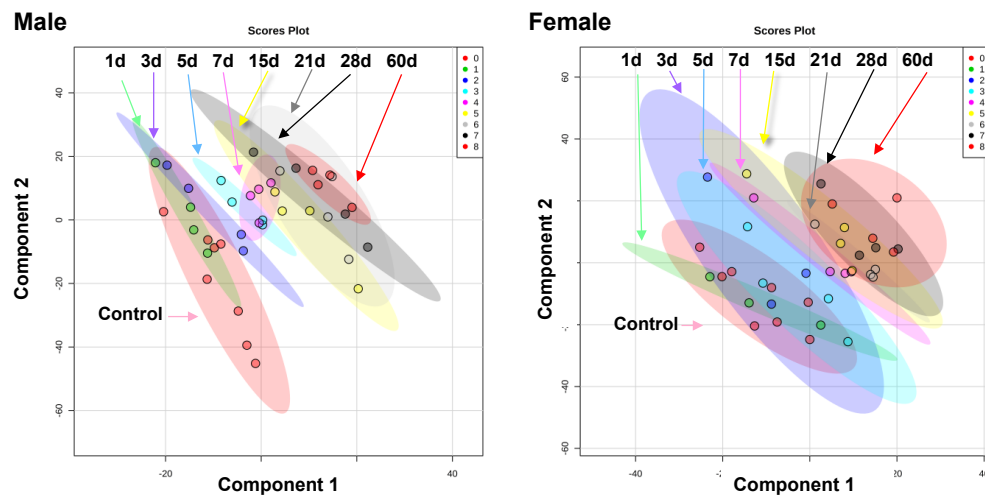

**Figure S1.** PLS-DA plots comparing pre-exposure to 1 – 60 d in urine for males and females after 4 Gy  $\gamma$ -ray TBI in NHPs. Similar separation is observed as grouped analysis, however, females show higher variation than males (graphs generated in MetaboAnalyst 4.0, pre-exposure samples [-8 and -3 d] were averaged for the control group).

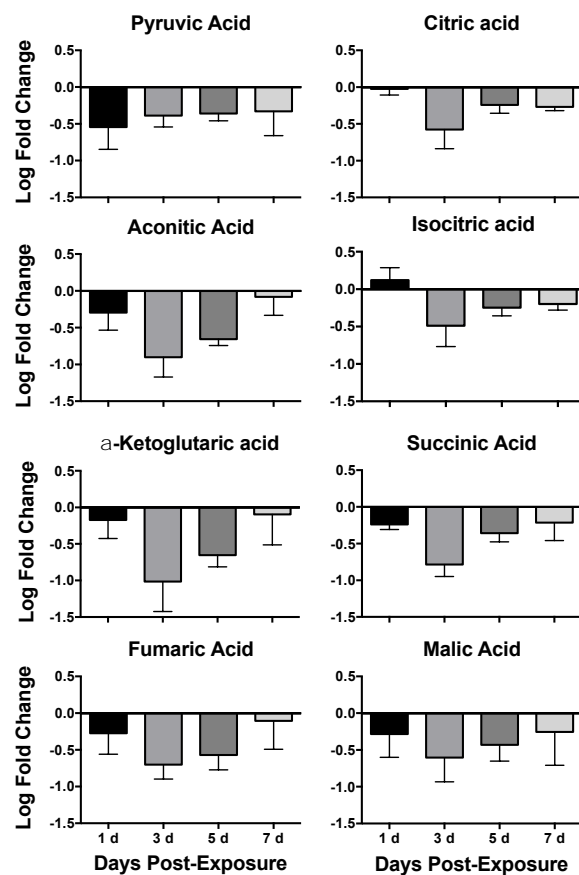

**Figure S2.** Log fold change of urinary TCA cycle intermediates significantly perturbed after 4  $\gamma$  Gy TBI in NHPs from 1 – 7 d. (pyruvic acid [P=0.085], citric acid [P=0.027], isocitric acid [P=0.041], succinic acid [P=0.004], *cis*-aconitic acid [P=0.047], fumaric acid [P=0.131], malic acid [P=0.196],  $\alpha$ -ketoglutaric acid [P=0.033];  $P < 0.05$  determined by a Kruskal-Wallis test, mean  $\pm$  SEM, pre-exposure samples [-8 and -3 d] were averaged for the control group).
